# Supplementary material for: A note about convected time derivatives for flows of complex fluids
Source: Royal Society of Chemistry journal article supplement (doi:10.1039/d3sm00497j), 2023-01-01
Supplement: d3sm00497j1.pdf [file d3sm00497j1.pdf]

## Supplementary Material for A note about convected time derivatives for flows of complex fluids

Howard A. Stone,<sup>1,\*</sup> Michael J. Shelley,<sup>2,3,†</sup> and Evgeniy Boyko<sup>1,4,‡</sup>

<sup>1</sup>*Department of Mechanical and Aerospace Engineering, Princeton University, New Jersey 08544, USA*

<sup>2</sup>*Courant Institute of Mathematical Sciences, New York University, New York, NY 10012, USA*

<sup>3</sup>*Center for Computational Biology, Flatiron Institute,*

*Simons Foundation, New York, NY 10010, USA*

<sup>4</sup>*Faculty of Mechanical Engineering, Technion–Israel Institute of Technology, Haifa, 3200003 Israel*

(Dated: May 28, 2023)

### CONTENTS

|                                                                                                      |   |
|------------------------------------------------------------------------------------------------------|---|
| S.1. Invariance associated with convected time derivatives of the conformation tensor                | 1 |
| S.2. Invariance associated with the constrained convected time derivative of the conformation tensor | 2 |
| S.3. Lagrangian integration of the Oldroyd-B constitutive equation                                   | 3 |
| References                                                                                           | 3 |

### S.1. INVARIANCE ASSOCIATED WITH CONVECTED TIME DERIVATIVES OF THE CONFORMATION TENSOR

Recall Sec. II in the manuscript on the kinematics of line elements, where the (Eulerian) time derivative  $\overset{\nabla}{\ell} = \mathbf{0}$  following the flow ( $\overset{\nabla}{\ell} = \frac{D\ell}{Dt} - \ell \cdot \nabla \mathbf{u}$ ) implies the invariant solution  $\ell_L \cdot \mathbf{F}^{-1} = \text{constant}$ , from which the time variation of  $\ell_L(t; \mathbf{X})$  can be determined for a given flow or  $\mathbf{F}$  (see Eq. (8)). Following similar steps, one can take a Lagrangian view and integrate the equation  $\overset{\nabla}{\mathbf{A}} = \frac{D\mathbf{A}}{Dt} - (\nabla \mathbf{u})^T \cdot \mathbf{A} - \mathbf{A} \cdot \nabla \mathbf{u} = \mathbf{0}$ . We use the identities  $\mathbf{F}^{-1} \cdot \mathbf{F} = \mathbf{I}$ ,  $\mathbf{F}^T \cdot \mathbf{F}^{-T} = \mathbf{I}$ ,  $\frac{\partial \mathbf{F}^{-T}}{\partial t} = -\mathbf{F}^{-T} \cdot (\nabla \mathbf{u})^T$ ,  $\frac{\partial \mathbf{F}}{\partial t} = \mathbf{F} \cdot \nabla \mathbf{u}$ , and take a Lagrangian notation with  $\mathbf{A}(\mathbf{x}, t) = \mathbf{A}_L(t; \mathbf{X})$  to write

$$\begin{aligned} \overset{\nabla}{\mathbf{A}} &= \frac{\partial \mathbf{A}_L}{\partial t} - \mathbf{F}^T \cdot \mathbf{F}^{-T} \cdot (\nabla \mathbf{u})^T \cdot \mathbf{A}_L - \mathbf{A}_L \cdot \mathbf{F}^{-1} \cdot \mathbf{F} \cdot \nabla \mathbf{u} \\ &= \frac{\partial \mathbf{A}_L}{\partial t} + \mathbf{F}^T \cdot \frac{\partial \mathbf{F}^{-T}}{\partial t} \cdot \mathbf{A}_L - \mathbf{A}_L \cdot \mathbf{F}^{-1} \cdot \frac{\partial \mathbf{F}}{\partial t} = \frac{\partial \mathbf{A}_L}{\partial t} + \mathbf{F}^T \cdot \frac{\partial \mathbf{F}^{-T}}{\partial t} \cdot \mathbf{A}_L + \mathbf{A}_L \cdot \frac{\partial \mathbf{F}^{-1}}{\partial t} \cdot \mathbf{F}. \end{aligned} \quad (\text{S1})$$

Right multiplying by  $\mathbf{F}^{-1}$  and left multiplying by  $\mathbf{F}^{-T}$  yields

$$\mathbf{F}^{-T} \cdot \overset{\nabla}{\mathbf{A}} \cdot \mathbf{F}^{-1} = \mathbf{F}^{-T} \cdot \frac{\partial \mathbf{A}_L}{\partial t} \cdot \mathbf{F}^{-1} + \frac{\partial \mathbf{F}^{-T}}{\partial t} \cdot \mathbf{A}_L \cdot \mathbf{F}^{-1} + \mathbf{F}^{-T} \cdot \mathbf{A}_L \cdot \frac{\partial \mathbf{F}^{-1}}{\partial t} = \frac{\partial}{\partial t} (\mathbf{F}^{-T} \cdot \mathbf{A}_L \cdot \mathbf{F}^{-1}). \quad (\text{S2})$$

Thus, we conclude that  $\overset{\nabla}{\mathbf{A}} = \mathbf{0}$  implies

$$\frac{\partial}{\partial t} (\mathbf{F}^{-T} \cdot \mathbf{A}_L \cdot \mathbf{F}^{-1}) = \mathbf{0} \quad \text{or} \quad \mathbf{F}^{-T} \cdot \mathbf{A}_L \cdot \mathbf{F}^{-1} = \text{constant}, \quad (\text{S3})$$

following the fluid motion, i.e., it is an invariant. Using the initial data,  $\mathbf{F}^{-T} \cdot \mathbf{A}_L \cdot \mathbf{F}^{-1} = \mathbf{A}_L(0; \mathbf{X})$  since  $\mathbf{F}(0) = \mathbf{I}$ , which means  $\mathbf{A}_L = \mathbf{F}^T \cdot \mathbf{A}_L(0; \mathbf{X}) \cdot \mathbf{F}$ . For example, if  $\mathbf{A}_L(0; \mathbf{X}) = \mathbf{I}$ , i.e., an undeformed isotropic state, then  $\mathbf{A}_L = \mathbf{F}^T \cdot \mathbf{F}$ .

Similarly, one can show for the lower-convected time derivative that  $\overset{\Delta}{\mathbf{A}} = \mathbf{0}$  implies  $\frac{\partial}{\partial t} (\mathbf{F} \cdot \mathbf{A}_L \cdot \mathbf{F}^T) = \mathbf{0}$ . Thus,  $\mathbf{F} \cdot \mathbf{A}_L \cdot \mathbf{F}^T$  is an invariant following the motion.

\* [hastone@princeton.edu](mailto:hastone@princeton.edu)

† [mshelley@flatironinstitute.org](mailto:mshelley@flatironinstitute.org)

‡ [evgboyko@technion.ac.il](mailto:evgboyko@technion.ac.il)

## S.2. INVARIANCE ASSOCIATED WITH THE CONSTRAINED CONVECTED TIME DERIVATIVE OF THE CONFORMATION TENSOR

It is possible to extend the ideas introduced above for identifying invariances following the fluid motion when  $\overset{\nabla}{\mathbf{A}} = \mathbf{0}$  to the case of  $\overset{\nabla}{\mathbf{A}} = -2\mathbf{A} \cdot \mathbf{E} \cdot \mathbf{A}$ , corresponding to the constrained upper-convected time derivative.

Using a Lagrangian notation with  $\mathbf{A}(\mathbf{x}, t) = \mathbf{A}_L(t; \mathbf{X})$  and Eq. (S1),  $\overset{\nabla}{\mathbf{A}} = -2\mathbf{A} \cdot \mathbf{E} \cdot \mathbf{A}$  can be expressed as

$$\overset{\nabla}{\mathbf{A}} = \frac{\partial \mathbf{A}_L}{\partial t} + \mathbf{F}^T \cdot \frac{\partial \mathbf{F}^{-T}}{\partial t} \cdot \mathbf{A}_L + \mathbf{A}_L \cdot \frac{\partial \mathbf{F}^{-1}}{\partial t} \cdot \mathbf{F} = -2\mathbf{A}_L \cdot \mathbf{E} \cdot \mathbf{A}_L. \quad (\text{S4})$$

Right multiplying by  $\mathbf{F}^{-1}$  and left multiplying by  $\mathbf{F}^{-T}$  and using Eq. (S2),  $\mathbf{F}^{-1} \cdot \mathbf{F} = \mathbf{I}$ , and  $\mathbf{F}^T \cdot \mathbf{F}^{-T} = \mathbf{I}$ , Eq. (S4) yields

$$\frac{\partial}{\partial t} (\mathbf{F}^{-T} \cdot \mathbf{A}_L \cdot \mathbf{F}^{-1}) = -2 (\mathbf{F}^{-T} \cdot \mathbf{A}_L \cdot \mathbf{F}^{-1}) \cdot (\mathbf{F} \cdot \mathbf{E} \cdot \mathbf{F}^T) \cdot (\mathbf{F}^{-T} \cdot \mathbf{A}_L \cdot \mathbf{F}^{-1}). \quad (\text{S5})$$

Using the identities  $\frac{\partial \mathbf{F}}{\partial t} = \mathbf{F} \cdot \nabla \mathbf{u}$  and  $\frac{\partial \mathbf{F}^T}{\partial t} = (\nabla \mathbf{u})^T \cdot \mathbf{F}^T$ , the term  $2(\mathbf{F} \cdot \mathbf{E} \cdot \mathbf{F}^T)$  in Eq. (S5) can be expressed as

$$2(\mathbf{F} \cdot \mathbf{E} \cdot \mathbf{F}^T) = \mathbf{F} \cdot (\nabla \mathbf{u} + (\nabla \mathbf{u})^T) \cdot \mathbf{F}^T = \frac{\partial \mathbf{F}}{\partial t} \cdot \mathbf{F}^T + \mathbf{F} \cdot \frac{\partial \mathbf{F}^T}{\partial t} = \frac{\partial}{\partial t} (\mathbf{F} \cdot \mathbf{F}^T), \quad (\text{S6})$$

so that Eq. (S5) takes the form

$$\frac{\partial}{\partial t} (\mathbf{F}^{-T} \cdot \mathbf{A}_L \cdot \mathbf{F}^{-1}) = -(\mathbf{F}^{-T} \cdot \mathbf{A}_L \cdot \mathbf{F}^{-1}) \cdot \frac{\partial}{\partial t} (\mathbf{F} \cdot \mathbf{F}^T) \cdot (\mathbf{F}^{-T} \cdot \mathbf{A}_L \cdot \mathbf{F}^{-1}). \quad (\text{S7})$$

or

$$\frac{\partial \mathbf{G}_L}{\partial t} = -\mathbf{G}_L \cdot \frac{\partial}{\partial t} (\mathbf{F} \cdot \mathbf{F}^T) \cdot \mathbf{G}_L \quad \text{with} \quad \mathbf{G}_L = \mathbf{F}^{-T} \cdot \mathbf{A}_L \cdot \mathbf{F}^{-1}. \quad (\text{S8})$$

Under the assumption that  $\mathbf{G}_L$  (in fact,  $\mathbf{A}_L$ ) is *invertible* and using the identities  $\mathbf{G}_L^{-1} = \mathbf{F} \cdot \mathbf{A}_L^{-1} \cdot \mathbf{F}^T$  and  $\frac{\partial \mathbf{G}_L}{\partial t} = -\mathbf{G}_L \cdot \frac{\partial \mathbf{G}_L^{-1}}{\partial t} \cdot \mathbf{G}_L$ , from Eq. (S8) it follows that

$$\frac{\partial \mathbf{G}_L^{-1}}{\partial t} = \frac{\partial}{\partial t} (\mathbf{F} \cdot \mathbf{F}^T) \quad \text{or} \quad \frac{\partial}{\partial t} (\mathbf{G}_L^{-1} - \mathbf{F} \cdot \mathbf{F}^T) = \frac{\partial}{\partial t} (\mathbf{F} \cdot \mathbf{A}_L^{-1} \cdot \mathbf{F}^T - \mathbf{F} \cdot \mathbf{F}^T) = \mathbf{0}. \quad (\text{S9})$$

It follows that  $\mathbf{F} \cdot \mathbf{A}_L^{-1} \cdot \mathbf{F}^T - \mathbf{F} \cdot \mathbf{F}^T = \text{constant}$ , following the fluid motion, i.e., it is an invariant. Using the initial data, we obtain  $\mathbf{F} \cdot \mathbf{A}_L^{-1} \cdot \mathbf{F}^T - \mathbf{F} \cdot \mathbf{F}^T = \mathbf{A}_L^{-1}(0; \mathbf{X}) - \mathbf{I}$  since  $\mathbf{F}(0) = \mathbf{I}$ , which means  $\mathbf{A}_L^{-1}(t; \mathbf{X}) = \mathbf{I} - \mathbf{F}^{-1} \cdot \mathbf{F}^{-T} + \mathbf{F}^{-1} \cdot \mathbf{A}_L^{-1}(0; \mathbf{X}) \cdot \mathbf{F}^{-T}$ .

Similarly, one can show for the constrained lower-convected time derivative,  $\overset{\Delta}{\mathbf{A}} = 2\mathbf{A} \cdot \mathbf{E} \cdot \mathbf{A}$ , that

$$\frac{\partial}{\partial t} (\mathbf{F} \cdot \mathbf{A}_L \cdot \mathbf{F}^T) = 2 (\mathbf{F} \cdot \mathbf{A}_L \cdot \mathbf{F}^T) \cdot (\mathbf{F}^{-T} \cdot \mathbf{E} \cdot \mathbf{F}^{-1}) \cdot (\mathbf{F} \cdot \mathbf{A}_L \cdot \mathbf{F}^T). \quad (\text{S10})$$

Using the identities  $\frac{\partial \mathbf{F}^{-T}}{\partial t} = -\mathbf{F}^{-T} \cdot (\nabla \mathbf{u})^T$  and  $\frac{\partial \mathbf{F}^{-1}}{\partial t} = -\nabla \mathbf{u} \cdot \mathbf{F}^{-1}$ , the term  $2(\mathbf{F}^{-T} \cdot \mathbf{E} \cdot \mathbf{F}^{-1})$  in Eq. (S10) can be expressed as

$$2(\mathbf{F}^{-T} \cdot \mathbf{E} \cdot \mathbf{F}^{-1}) = \mathbf{F}^{-T} \cdot (\nabla \mathbf{u} + (\nabla \mathbf{u})^T) \cdot \mathbf{F}^{-1} = -\mathbf{F}^{-T} \cdot \frac{\partial \mathbf{F}^{-1}}{\partial t} - \frac{\partial \mathbf{F}^{-T}}{\partial t} \cdot \mathbf{F}^{-1} = -\frac{\partial}{\partial t} (\mathbf{F}^{-T} \cdot \mathbf{F}^{-1}), \quad (\text{S11})$$

so that Eq. (S10) takes the form

$$\frac{\partial}{\partial t} (\mathbf{F} \cdot \mathbf{A}_L \cdot \mathbf{F}^T) = -(\mathbf{F} \cdot \mathbf{A}_L \cdot \mathbf{F}^T) \cdot \frac{\partial}{\partial t} (\mathbf{F}^{-T} \cdot \mathbf{F}^{-1}) \cdot (\mathbf{F} \cdot \mathbf{A}_L \cdot \mathbf{F}^T), \quad (\text{S12})$$

or

$$\frac{\partial \mathbf{H}_L}{\partial t} = -\mathbf{H}_L \cdot \frac{\partial}{\partial t} (\mathbf{F}^{-T} \cdot \mathbf{F}^{-1}) \cdot \mathbf{H}_L \quad \text{with} \quad \mathbf{H}_L = \mathbf{F} \cdot \mathbf{A}_L \cdot \mathbf{F}^T. \quad (\text{S13})$$

Again, under the assumption that  $\mathbf{H}_L$  (in fact,  $\mathbf{A}_L$ ) is *invertible* and using the identities  $\mathbf{H}_L^{-1} = \mathbf{F}^{-T} \cdot \mathbf{A}_L^{-1} \cdot \mathbf{F}^{-1}$  and  $\frac{\partial \mathbf{H}_L}{\partial t} = -\mathbf{H}_L \cdot \frac{\partial \mathbf{H}_L^{-1}}{\partial t} \cdot \mathbf{H}_L$ , from Eq. (S13) it follows that

$$\frac{\partial \mathbf{H}_L^{-1}}{\partial t} = \frac{\partial}{\partial t} (\mathbf{F}^{-T} \cdot \mathbf{F}^{-1}) \quad \text{or} \quad \frac{\partial}{\partial t} (\mathbf{H}_L^{-1} - \mathbf{F}^{-T} \cdot \mathbf{F}^{-1}) = \frac{\partial}{\partial t} (\mathbf{F}^{-T} \cdot \mathbf{A}_L^{-1} \cdot \mathbf{F}^{-1} - \mathbf{F}^{-T} \cdot \mathbf{F}^{-1}) = \mathbf{0}. \quad (\text{S14})$$

Thus,  $\mathbf{F}^{-T} \cdot \mathbf{A}_L^{-1} \cdot \mathbf{F}^{-1} - \mathbf{F}^{-T} \cdot \mathbf{F}^{-1}$  is an invariant following the motion.

### S.3. LAGRANGIAN INTEGRATION OF THE OLDROYD-B CONSTITUTIVE EQUATION

The ideas introduced in Sec. II and III C for identifying invariances following the fluid motion can also be applied to the evolution equation for the conformation tensor when elastic stresses are included. For example, consider the Oldroyd-B constitutive equation (Eq. (36)),  $\overset{\nabla}{\mathbf{A}} = -\lambda_0^{-1}(\mathbf{A} - \mathbf{I})$ , where  $\lambda_0$  is a constant relaxation time. In this case, using Eq. (S1) and a Lagrangian notation with  $\mathbf{A}(\mathbf{x}, t) = \mathbf{A}_L(t; \mathbf{X})$ , we have

$$\frac{\partial \mathbf{A}_L}{\partial t} + \mathbf{F}^T \cdot \frac{\partial \mathbf{F}^{-T}}{\partial t} \cdot \mathbf{A}_L + \mathbf{A}_L \cdot \frac{\partial \mathbf{F}^{-1}}{\partial t} \cdot \mathbf{F} = -\frac{1}{\lambda_0}(\mathbf{A}_L - \mathbf{I}). \quad (\text{S15})$$

Now, recalling the steps just above, right multiplying by  $\mathbf{F}^{-1}$  and left multiplying by  $\mathbf{F}^{-T}$  yields

$$\frac{\partial}{\partial t} (\mathbf{F}^{-T} \cdot \mathbf{A}_L \cdot \mathbf{F}^{-1}) = -\frac{1}{\lambda_0} \mathbf{F}^{-T} \cdot (\mathbf{A}_L - \mathbf{I}) \cdot \mathbf{F}^{-1}. \quad (\text{S16})$$

Thus, we find an ordinary differential equation for  $\mathbf{F}^{-T} \cdot \mathbf{A}_L \cdot \mathbf{F}^{-1}$  with a time-dependent forcing,

$$\frac{\partial}{\partial t} (\mathbf{F}^{-T} \cdot \mathbf{A}_L \cdot \mathbf{F}^{-1}) + \frac{1}{\lambda_0} \mathbf{F}^{-T} \cdot \mathbf{A}_L \cdot \mathbf{F}^{-1} = \frac{1}{\lambda_0} \mathbf{F}^{-T} \cdot \mathbf{F}^{-1}. \quad (\text{S17})$$

This equation is to be solved with initial data (suppressing dependence on  $\mathbf{X}$ )  $\mathbf{F}^{-T} \cdot \mathbf{A}_L \cdot \mathbf{F}^{-1} = \mathbf{A}_L(0)$  since  $\mathbf{F}(0) = \mathbf{I}$ . Therefore, integrating, we obtain (see, e.g. [1, 2]),

$$\mathbf{F}^{-T}(t) \cdot \mathbf{A}_L(t) \cdot \mathbf{F}^{-1}(t) = e^{-t/\lambda_0} \mathbf{A}_L(0) + \frac{1}{\lambda_0} \int_0^t \mathbf{F}^{-T}(t') \cdot \mathbf{F}^{-1}(t') e^{-(t-t')/\lambda_0} dt', \quad (\text{S18})$$

or

$$\mathbf{A}_L(t) = e^{-t/\lambda_0} \mathbf{F}^T(t) \cdot \mathbf{A}_L(0) \cdot \mathbf{F}(t) + \frac{1}{\lambda_0} \mathbf{F}^T(t) \cdot \int_0^t \mathbf{F}^{-T}(t') \cdot \mathbf{F}^{-1}(t') e^{-(t-t')/\lambda_0} dt' \cdot \mathbf{F}(t). \quad (\text{S19})$$

---

[1] C. Hohenegger and M. J. Shelley, *Dynamics of Complex Bio-Fluids* (Oxford University Press, Oxford, 2011).

[2] J. H. Snoeijer, A. Pandey, M. A. Herrada, and J. Eggers, The relationship between viscoelasticity and elasticity, *Proc. R. Soc. Lond. A* **476**, 20200419 (2020).
